# Supplementary material for: Organizational life cycle assessment: suitability for higher education institutions with environmental management systems
Source: Springer Nature journal article supplement (doi:10.1007/s11367-017-1289-8), 2017-03-30
Supplement: MOESM3 [file 12189098]

**Annex 3 Prioritization procedure for the EPSA LCI analysis**

For a better analysis, the LCI is divided into 2 matrixes: significant (Table S3) and insignificant (Table S4) environmental aspects. Table 11 presents results from both tables. Scores are assigned following the proposed score assignment rule (Table 1 of the main body of the article).

**Table S3** Matrix of activities and processes for significant (S) EAs

| **Scope** | | 1 | 1 | 2 | 2 | 2 | 2 | 2 | 3 | 3 | 3 | 3 | 3 | 3 | 3 | 3 |  |
| --- | --- | --- | --- | --- | --- | --- | --- | --- | --- | --- | --- | --- | --- | --- | --- | --- | --- |
| Reporting organization: EPSA - UPV | Activities and processes | Administrative procedures | Mobility within UPV fleet | Lighting and lift system | Sanitary system | Heating system | Air conditioning system | Waste management system | Capital equipment procurement | Outsourcing: Cleaning services | Outsourcing: Maintenance of infrastructure | Outsourcing: Electric maintenance | Outsourcing: Security system | Outsourcing: Construction services | Outsourcing: Cafeteria | Outsourcing: others | **Score by EA** |
| **Environmental Aspects (EA)** | **CS**  **EAS** | **CC** | **PC** | **CC** | **PC** | **PC** | **PC** | **CC** | **CC** | **PC** | **PC** | **PC** | **PC** | **PC** | **PC** | PC |
| Water consumption | **S** |  |  |  | 3 |  |  |  |  |  | 2 |  |  | 2 | 2 |  | **9** |
| Electricity consumption | **S** |  |  | 3 |  |  | 2 |  |  | 2 | 2 | 2 | 2 | 2 | 2 |  | **17** |
| Battery waste generation | **S** |  |  | 3 |  |  |  |  |  |  |  |  |  |  |  |  | **3** |
| CD waste generation | **S** | 3 |  |  |  |  |  |  |  |  |  |  |  |  |  |  | **3** |
| Electronic waste generation | **S** |  |  |  |  |  |  |  |  |  | 2 | 2 |  |  |  |  | **4** |
| Paper and cardboard waste generation | **S** | 3 |  |  |  |  |  | 3 |  |  |  | 2 |  |  | 2 |  | **10** |
| Office supply consumption (1) | **S** | 3 |  |  |  |  |  | 3 |  |  |  |  |  |  |  |  | **6** |
| Supply consumption (1) | **S** |  |  |  |  |  |  | 3 |  |  |  |  |  |  |  |  | **3** |
| Automobile procurement (1) | **S** |  | 2 |  |  |  |  |  |  |  |  |  |  |  |  |  | **2** |
| Movable asset consumption (1) | **S** |  |  |  |  |  |  |  | 3 |  |  |  |  |  |  |  | **3** |
| Technology asset consumption (1) | **S** |  |  |  |  |  |  |  | 3 |  |  |  |  |  |  |  | **3** |
| Environmental behavior of external companies (2) | S |  |  |  |  |  |  |  |  | 2 | 2 | 2 | 2 | 2 | 2 | 2 | **14** |
| Emission generation due to gas/oil consumption (3) | S |  | 2 |  |  |  |  |  |  |  |  |  |  |  |  |  | **2** |
| Waste water generation | S |  |  |  | 3 |  |  |  |  | 2 | 2 |  |  | 2 | 2 |  | **11** |
| Automobile waste generation | S |  | 2 |  |  |  |  |  |  |  |  |  |  |  |  |  | **2** |
| **Score for activities and processes** | | **9** | **6** | **6** | **6** | **0** | **2** | **9** | **6** | **6** | **10** | **8** | **4** | **8** | **10** | **2** | **92** |

(1) The EMS assessed as a unified EA for consumption. It is disaggregated for better analysis according to the scope of this work.

(2) Refers to the 'services' input related to outsourcing.

(3) The EMS assesses a unified EA for emissions due to energy. It is disaggregated for better analysis according to the scope of this work.

**Table S4** Matrix of activities and processes for insignificant (NS) EAs

| **Scope** | 1 | 1 | 2 | 2 | 2 | 2 | 2 | 3 | 3 | 3 | 3 | 3 | 3 | 3 | 3 | **Score by EA** |
| --- | --- | --- | --- | --- | --- | --- | --- | --- | --- | --- | --- | --- | --- | --- | --- | --- |
| Reporting organization: EPSA - UPV | Activities and processes | Administrative procedures | Mobility within UPV fleet | Lighting and lift system | Sanitary system | Heating system | Air conditioning system | Waste management system | Capital equipment procurement | Outsourcing: Cleaning services | Outsourcing: Maintenance of infrastructure | Outsourcing: Electric maintenance | Outsourcing: Security system | Outsourcing: Construction services | Outsourcing: Cafeteria |
| **Environmental Aspects (EA)** | **CS**  **EAS** | **CC** | **PC** | **CC** | **PC** | **PC** | **PC** | **CC** | **CC** | **PC** | **PC** | **PC** | **PC** | **PC** | **PC** | **10** |
| Emissions due to electricity consumption (3) | NS |  |  | 2 |  |  | 1 |  |  | 1 | 1 | 1 | 1 | 1 | 1 | **2** |
| Debris generation | **NS** |  |  |  |  |  |  |  |  |  | 1 |  |  | 1 |  | **1** |
| Emissions due to air conditioning, HFC | NS |  |  |  |  |  | 1 |  |  |  |  |  |  |  |  | **2** |
| Fossil fuel consumption: natural gas (4) | **NS** |  |  |  |  | 1 |  |  |  |  |  |  |  |  | 1 | **1** |
| Fossil fuel consumption: gas/oil (4) | **NS** |  | 1 |  |  |  |  |  |  |  |  |  |  |  |  | **2** |
| Emissions due to natural gas consumption (3) | **NS** |  |  |  |  | 1 |  |  |  |  |  |  |  |  | 1 | **1** |
| Oil, fuel and hydrocarbon waste generation | **NS** |  |  |  |  |  |  |  |  |  | 1 |  |  |  |  | **9** |
| Light packaging waste generation | **NS** | 2 |  |  |  |  |  | 3 |  | 1 | 1 | 1 |  |  | 1 | **10** |
| Municipal solid waste generation | **NS** | 2 |  |  |  |  |  | 3 |  | 1 | 1 | 1 |  | 1 | 1 | **5** |
| Ink and tonner waste generation | **NS** | 2 |  |  |  |  |  | 3 |  |  |  |  |  |  |  | 43 |
| **Score for activities and processes** | | **6** | **1** | **2** | **0** | **2** | **2** | **9** | **0** | **3** | **5** | **3** | **1** | **3** | **5** | **1** |

(3) The EMS is assessed as a unified EA for emissions due to energy. It is disaggregated for better analysis according to the scope of this work

(4) The EMS assessed as a unified EA for fossil fuel consumption. It is disaggregated for better analysis according to the scope of this work

Table S5 presents scores for activities and processes that are significant (S) and insignificant (NS) EAs.

**Table S5** Summarymatrix of activities and processes for significant (S) and insignificant (NS) EAs.

| Activities and processes | Administrative procedures | Mobility within UPV fleet | Lighting and lift system | Sanitary system | Heating system | Air conditioning system | Waste management system | Capital equipment procurement | Outsourcing: Cleaning services | Outsourcing: Maintenance of infrastructure | Outsourcing: Electric maintenance | Outsourcing: Security system | Outsourcing: Construction services | Outsourcing: Cafeteria | Outsourcing: Other | **Score by EA** |
| --- | --- | --- | --- | --- | --- | --- | --- | --- | --- | --- | --- | --- | --- | --- | --- | --- |
| **CS** | **CC** | **PC** | **CC** | **PC** | **PC** | **PC** | **CC** | **CC** | **PC** | **PC** | **PC** | **PC** | **PC** | **PC** | **PC** |
| Significant EA | 9 | 6 | 6 | 6 | 0 | 2 | 9 | 6 | 6 | 10 | 8 | 4 | 8 | 10 | 2 | **92** |
| Insignificant EA | 6 | 1 | 2 | 0 | 2 | 2 | 9 | 0 | 3 | 5 | 3 | 1 | 3 | 5 | 1 | **43** |
| **Total score for activities and processes** | **15** | **7** | **8** | **6** | **2** | **4** | **18** | **6** | **9** | **15** | **11** | **5** | **11** | **15** | **3** | **135** |
